# Supplementary material for: Coordination Polymer Based on a Triangular Carboxylate Core {Fe(μ3-O)(μ-O2CR)6} and an Aliphatic Diamine
Source: MDPI journal article supplement (doi:10.3390/molecules29092125), 2024-05-03
Supplement: s1 [file s1]

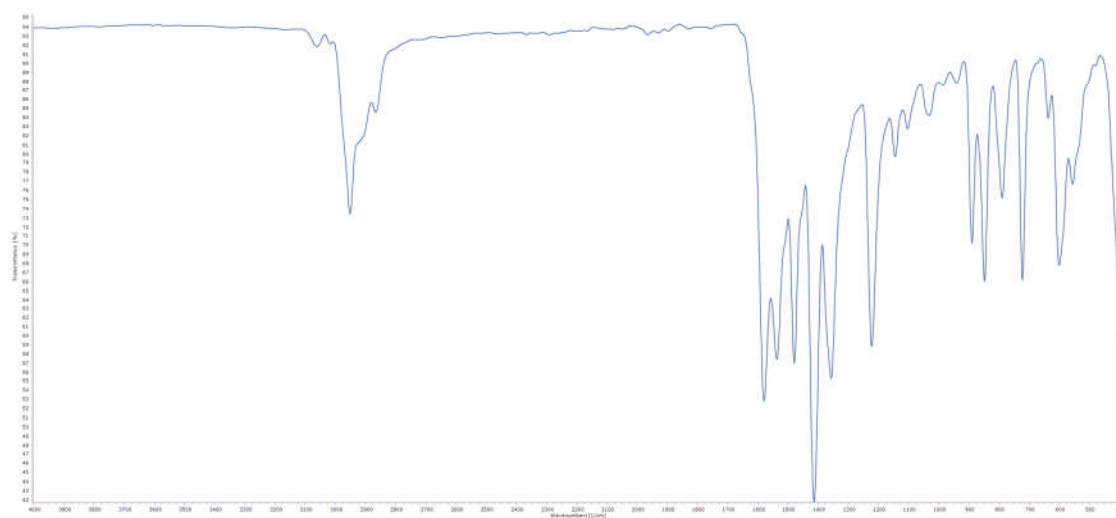

**Figure S1.** IR-Spectra of **1**

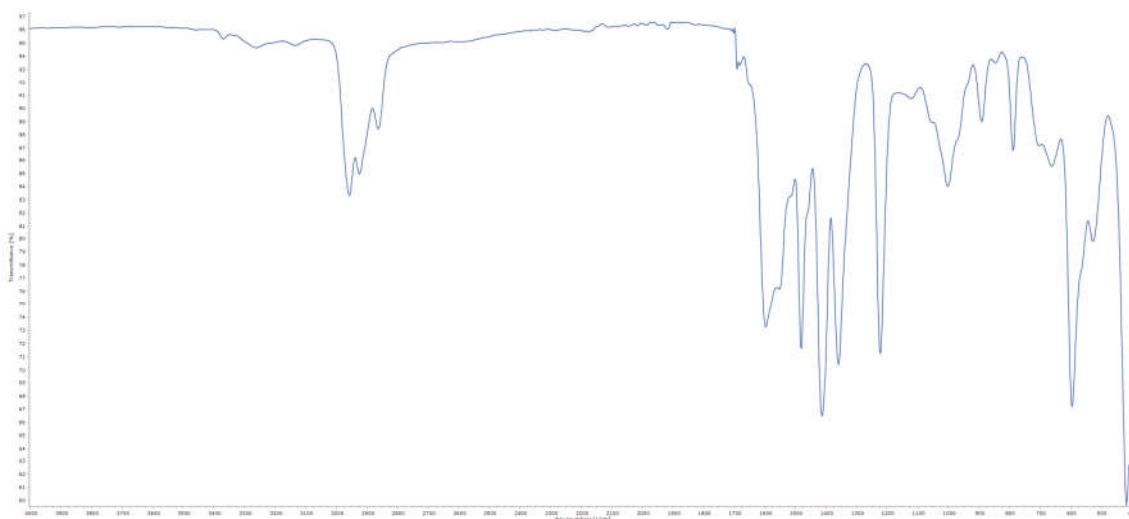

**Figure S2.** IR-Spectra of **2**

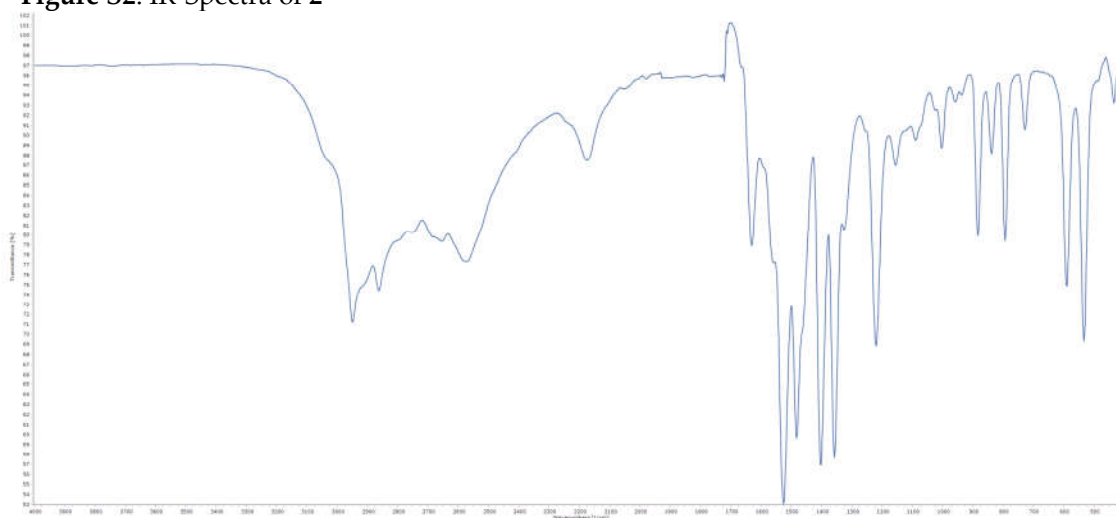

**Figure S3** IR-Spectra of **3**

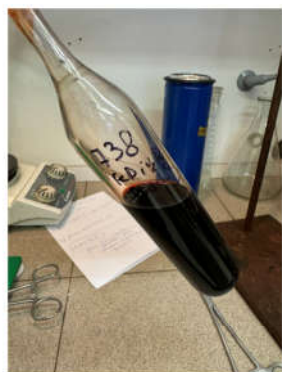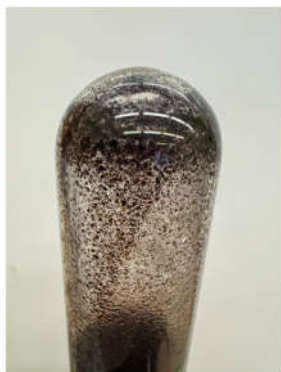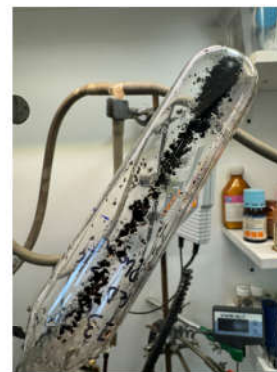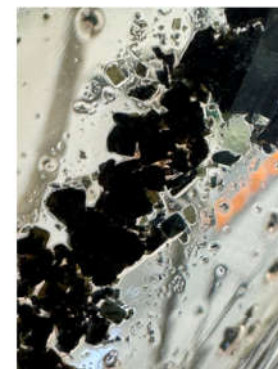

To the iron(II) pivalate prepared in situ from  $\text{FeSO}_4 \cdot 7\text{H}_2\text{O}$  (0.278 g, 1.0 mmol) and Kpiv (0.280 g, 2.0 mmol), 10 ml of acetonitrile was condensed and added 1,10-phenanthroline monohydrate (0.198 g, 1 mmol)

The filtrate was sealed in a glass ampoule, heated in an oil bath at a temperature of  $120^\circ\text{C}$  for 10 hours, further cooling to room temperature led to the formation of blue-green crystals

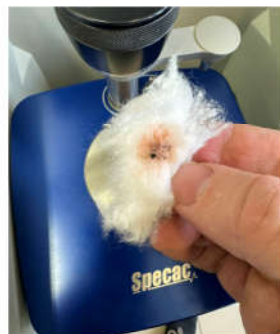

In air, blue-green crystals turn orange when exposed to acetone. However, powder in air without the action of a solvent is resistant to atmospheric oxygen for more than two months (see Figure S6)

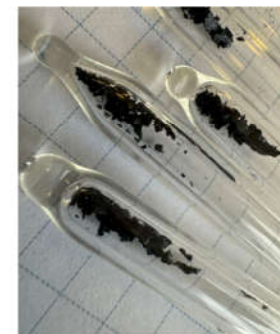

Isolated single crystals in a sealed glass ampoules

**Figure S4.** Synthesis of compound  $[\text{Fe}_2(\text{piv})_4(\text{phen})_2] \mathbf{1}$

8  
9  
10

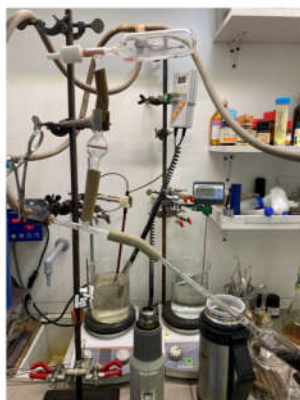

To the iron(II) pivalate prepared *in situ* from  $\text{FeSO}_4 \cdot 7\text{H}_2\text{O}$  (0.278 g, 1.0 mmol) and  $\text{Kpiv}$  (0.280 g, 2.0 mmol), 10 ml of acetonitrile was condensed and added 1,10-phenanthroline monohydrate (0.198 g, 1 mmol). The red-colored reaction mixture was filtered from potassium sulfate.

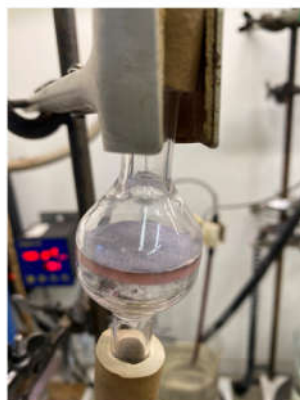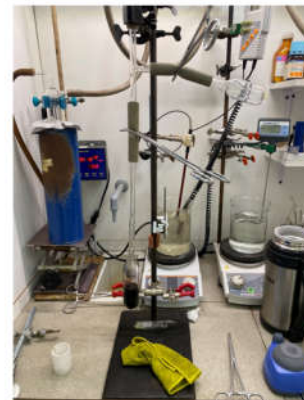

A solution of 1,6-diaminohexane (0.130 g, 1.12 mmol) in 2 ml of anhydrous  $\text{CH}_3\text{CN}$  was added to 1 mmol of complex **1** prepared *in situ* in 10 ml of acetonitrile. The reaction mixture was sealed in a glass ampoule and heated in an oil bath at  $100^\circ\text{C}$  for 5 hours until a solution was formed (caution! high pressure)

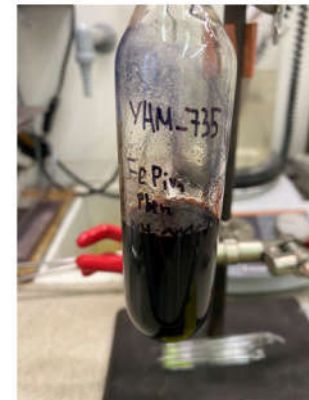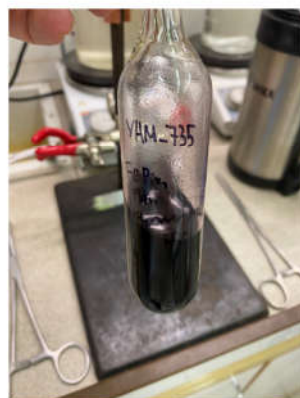

Cooling to room temperature ( $24^\circ\text{C}$ ) led to the formation of red (**2**, 0.122 g, 38% per 1 mmol **1**) and white crystals ( $(\text{piv})_2(\text{H}_2\text{hmda})$ , **3**).

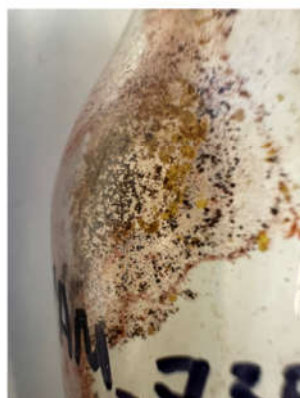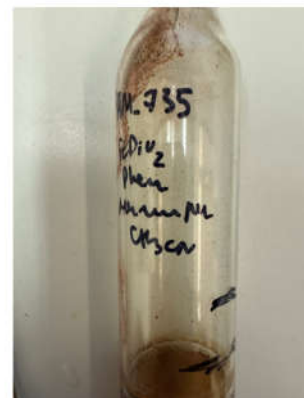

Isolated single crystals in a sealed glass ampoule. Separation of **2** and **3** was carried out by multiple decantation

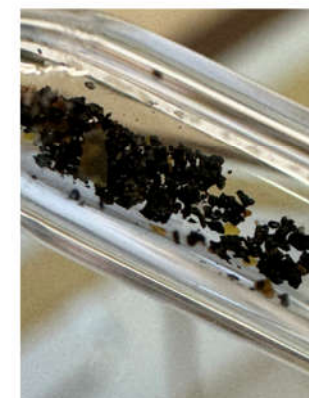

**Figure S5.** Synthesis of compound  $[\text{Fe}_3\text{O}(\text{Piv})_6(\text{NH}_2(\text{CH}_2)_6\text{NH}_2)_{1.5}]_n$  (**2**) + **3**

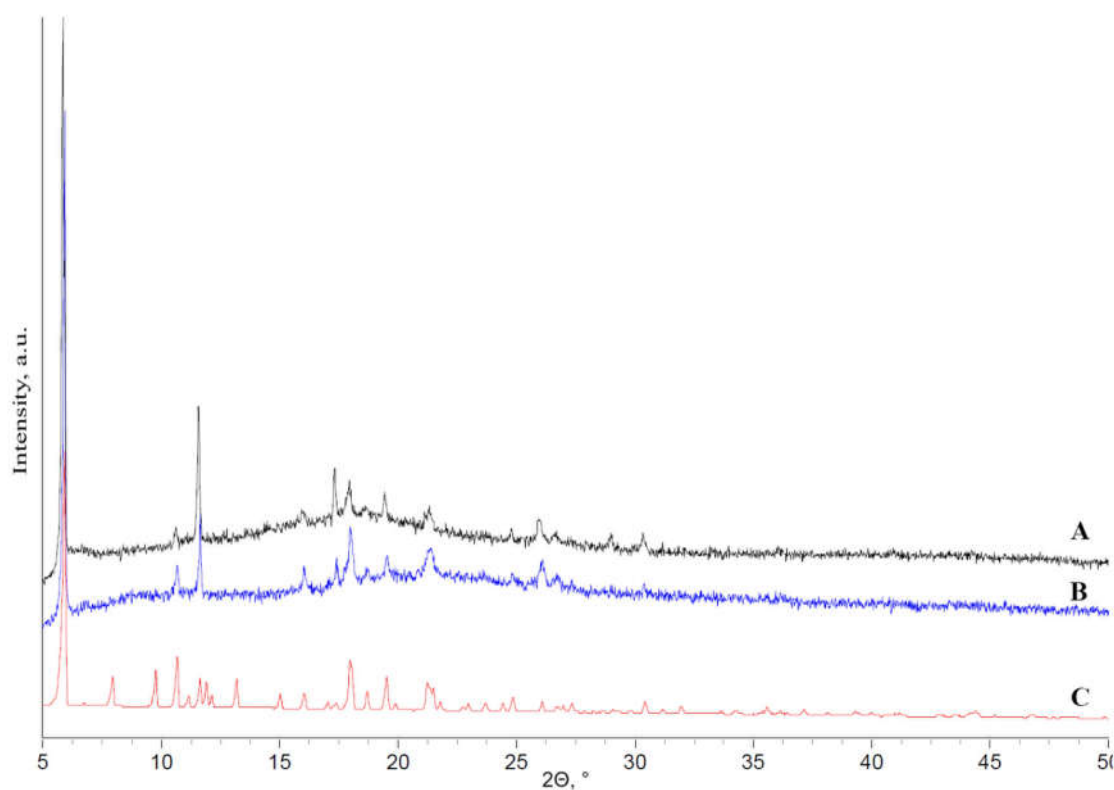

**Figure S6.** Comparison of experimental (A, black line 26 March 2024; B, blue line, 12 January 2024) and theoretical (C, red line) diffraction patterns for sample 1

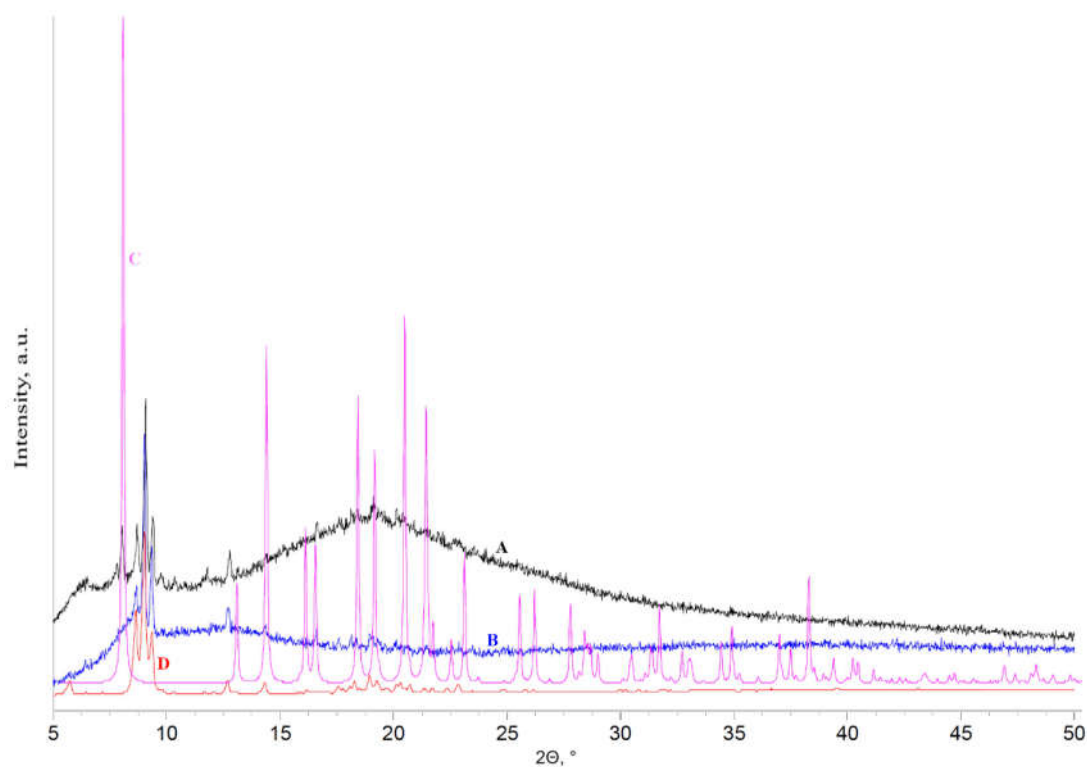

**Figure S7.** Comparison of experimental for sample 2 in time in air atmosphere (blue line (B) - after 40 min in air; black line (A) - after 13 h in air) and theoretical diffraction patterns for 2 (red line (C)) and 3 (pink line (D)).

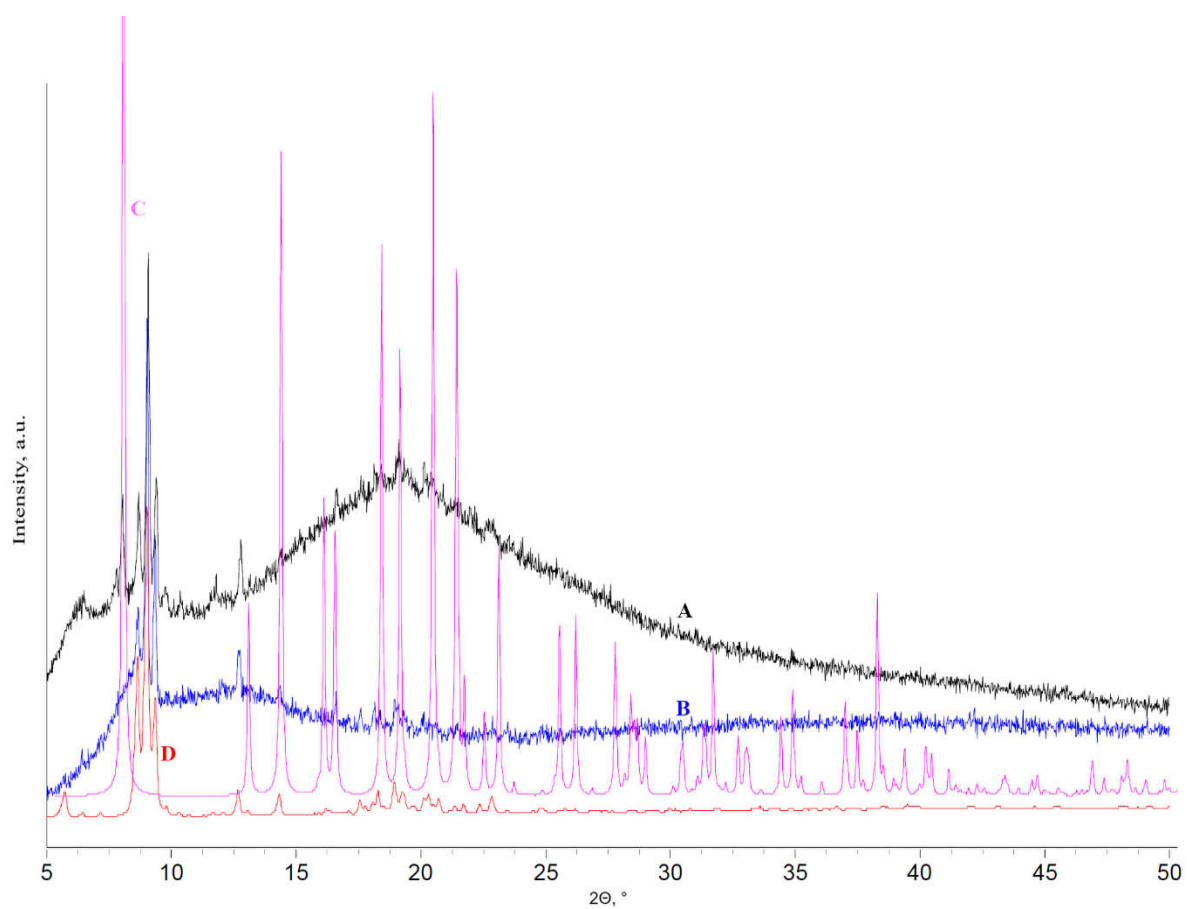

**Figure S8.** Comparison of experimental for sample 2 in time in air atmosphere (blue line (B) - after 40 min in air; black line (A) - after 2 months in air) and theoretical diffraction patterns for 2 (red line (C)) and 3 (pink line (D)).

21  
22  
23  
24  
25
